# Supplementary material for: A bibliometric analysis of acupuncture for cerebral infarction from 1993 to 2023
Source: PubMed Central journal article supplement (PMC11096454; doi:10.3389/fneur.2024.1386164), 2024-05-02
Supplement: Table_1.pdf [file Table_1.pdf]

**Table S1 Retrieval Strategy of acupuncture for Cerebral Infarction**

| No. | Search strategy                                       | Results |
|-----|-------------------------------------------------------|---------|
| 1   | TS= “cerebral infarction” AND “acupuncture”           | 147     |
| 2   | TS= “cerebral infarction” AND “acupuncture therapy”   | 54      |
| 3   | TS= “cerebral infarction” AND “Acupuncture, Ear”      | 0       |
| 4   | TS= “cerebral infarction” AND “Acupuncture Points”    | 13      |
| 5   | TS= “cerebral infarction” AND “Acupuncture Analgesia” | 0       |
| 6   | TS= “ischemic stroke” AND “acupuncture”               | 374     |
| 7   | TS= “ischemic stroke” AND “acupuncture therapy”       | 155     |
| 8   | TS= “ischemic stroke” AND “Acupuncture, Ear”          | 0       |
| 9   | TS= “ischemic stroke” AND “Acupuncture Points”        | 52      |
| 10  | TS= “ischemic stroke” AND “Acupuncture Analgesia”     | 2       |
